# Supplementary material
Source: HighWire-hosted journal article supplement (https://ez-admanager.com/highwire/filestream/135245/field_highwire_adjunct_files/0/5.5.15_Risk_and_protective_factors.pdf)
Supplement: 5.5.15_Risk_and_protective_factors.pdf [file 5.5.15_Risk_and_protective_factors.pdf]

## Risk and protective factors for cognitive impairment in persons aged 85 years and older

عوامل الخطر و الوقاية للإصابة بالاضطراب الذهني عند المعمرين 85 عاماً أو أكثر

**الهدف:** تحديد عوامل الخطر و الوقاية للاضطراب الذهني الخفيف (MCI) عند الأشخاص المعمرين 85 سنة وما فوق.

**طريقة البحث:** تم تقييم المشاركين في دراسة مايو كلينيك السكانية المستقبلية للشيخوخة بشكل مفصل عند بدء الدراسة وعلى فترات زمنية بالغة 15 شهراً لتحديد حدوث الاضطراب الذهني (MCI). تم تحديد العوامل المتعلقة بنمط الحياة في منتصف العمر و الشيخوخة من خلال استبيان ذاتي عند بدء الدراسة. تم تحديد حالة الأوعية الدموية و الأمراض المرافقة من السجلات الطبية للمشاركين.

**النتائج:** حدث الاضطراب الذهني الخفيف عند 121 مشاركاً من أصل 256 من الأصحاء عند المشاركة بالدراسة (متوسط العمر 87.3 عاماً، و 62% من النساء) بمتوسط زمني مقداره 4.1 سنة خلال فترة المتابعة. كانت العوامل التالية منبئة لحدوث الاضطراب الذهني: أليل APOE ε4 E4 (نسبة الخطر [HR] 1.89؛  $P = 0.008$ )، الأعراض الاكتئابية الحالية ( $HR 1.78 P = 0.02$ )، ارتفاع ضغط الدم في منتصف العمر ( $HR 2.43 P = 0.005$ )، زيادة أمراض الأوعية الدموية ( $HR 1.13 P = 0.02$ )، والأمراض المزمنة مقيمة بمؤشر شارلسون ( $HR 1.08 P = 0.006$ ). تم التصحيح في النموذج الإحصائي للجنس والتعليم و العمر الذي استخدم كمتغير زمني. تناقص خطر الاضطراب الإدراكي للمشاركين الذين ذكروا مشاركتهم في الأنشطة الفنية ( $HR 0.27 P = 0.03$ )، و الحرفية ( $HR 0.55 P = 0.02$ )، و الاجتماعية ( $p=0.005$ ) ( $HR=0.45$ ) في كل من منتصف و المراحل المتأخرة من العمر، بالإضافة إلى استخدام الكمبيوتر في المراحل المتأخرة من العمر ( $HR 0.47 P = 0.008$ ).

**الاستنتاجات:** تزيد الأمراض المزمنة من خطر الإصابة بالاضطراب الإدراكي (MCI)، في حين أن عوامل نمط حياة معينة تقلل من خطر الإصابة في الأشخاص (85 سنة وما فوق). هذا يعني أن الاستراتيجيات الوقائية للاضطراب الإدراكي قد تحتاج للبدء في منتصف العمر، و ينبغي أن تستمر مدى الحياة الى وقت متأخر.

Objectives: To determine risk and protective factors for mild cognitive impairment (MCI) among persons 85 years and older.

Methods: Participants in the population-based prospective Mayo Clinic Study of Aging were comprehensively evaluated at baseline and at 15 monthly intervals to determine incident MCI. At baseline, lifestyle factors in midlife and late life were assessed by self-reported questionnaire; vascular and comorbid conditions were abstracted from participants' medical records.

Results: Of 256 participants who were cognitively normal at enrollment (median age 87.3 years, 62% women), 121 developed MCI at a median 4.1 years of follow-up. Predictors of MCI were APOE  $\epsilon$ 4 allele (hazard ratio [HR] 1.89;  $p = 0.008$ ), current depressive symptoms (HR 1.78;  $p = 0.02$ ), midlife onset of hypertension (HR 2.43;  $p = 0.005$ ), increasing number of vascular diseases (HR 1.13;  $p = 0.02$ ), and chronic conditions from the Charlson Comorbidity Index (HR 1.08;  $p = 0.006$ ). Models were adjusted for sex and education, with age as the time variable. The risk of MCI was reduced for participants who reported engagement in artistic (HR 0.27;  $p = 0.03$ ), craft (HR 0.55;  $p = 0.02$ ), and social (HR 0.45;  $p = 0.005$ ) activities in both midlife and late life, and in the use of a computer in late life (HR 0.47;  $p = 0.008$ ).

Conclusions: Chronic disease burden increases risk of MCI, whereas certain lifestyle factors reduce risk in persons 85 years and older. This implies that preventive strategies for MCI may need to begin in midlife and should persist throughout late life.

---

**Translator: Amr Ewida MD, Department of Neurology, Case Western Reserve University, Cleveland, OH**

**Translation Reviewer: Yousef Hannawi MD, Neurosciences Critical Care Division, Department of Anesthesiology and Critical Care Medicine, Johns Hopkins University, Baltimore, MD**
